# Supplementary material for: The Haptoglobin Response after Aneurysmal Subarachnoid Haemorrhage
Source: MDPI journal article supplement (doi:10.3390/ijms242316922), 2023-11-29
Supplement: s1 [file s1]

**Supplementary Table 1** – Association between cerebrospinal fluid cytokines and serum haptoglobin levels by haptoglobin phenotype

| <b>Cytokines (pg/mL)</b> | <b>Hp 1-1 (95% CI)</b>                        | <b>P value</b> | <b>Hp 2-1 (95% CI)</b>                        | <b>P value</b> | <b>Hp 2-2 (95% CI)</b>                    | <b>P value</b> |
|--------------------------|-----------------------------------------------|----------------|-----------------------------------------------|----------------|-------------------------------------------|----------------|
| IFN-gamma                | 11.591<br>(-1.965 – 25.148)                   | 0.088          | 1.862<br>(-2.012 – 5.736)                     | 0.336          | -4.396<br>(-15.360 – 6.569)               | 0.415          |
| IL-1beta                 | 1.413<br>(-0.136 – 2.961)                     | 0.071          | <b>0.815</b><br><b>(0.300 – 1.329)</b>        | <b>0.003</b>   | -0.312<br>(-1.405 – 0.782)                | 0.561          |
| IL-10                    | 1.271<br>(-0.131 – 2.672)                     | 0.073          | <b>0.548</b><br><b>(0.155 – 0.941)</b>        | <b>0.008</b>   | -3.956<br>(-10.815 – 2.903)               | 0.245          |
| IL-12p70                 | <b>9.796</b><br><b>(0.266 – 19.326)</b>       | <b>0.045</b>   | <b>2.588</b><br><b>(0.717 – 4.460)</b>        | <b>0.008</b>   | 0.278<br>(-6.448 – 7.005)                 | 0.933          |
| IL-13                    | 9.833<br>(-6.088 – 25.753)                    | 0.208          | <b>9.352</b><br><b>(4.326 – 14.378)</b>       | <b>0.001</b>   | -8.209<br>(-17.853 – 1.436)               | 0.092          |
| IL-2                     | 1.214<br>(-0.373 – 2.801)                     | 0.124          | <b>0.560</b><br><b>(0.163 – 0.957)</b>        | <b>0.007</b>   | -0.585<br>(-1.556 – 0.386)                | 0.225          |
| IL-4                     | <b>8.570</b><br><b>(0.013 – 17.128)</b>       | <b>0.050</b>   | <b>2.328</b><br><b>(1.049 – 3.606)</b>        | <b>0.001</b>   | -0.105<br>(-5.793 – 5.584)                | 0.970          |
| IL-6                     | <b>3057.935</b><br><b>(71.648 – 6044.221)</b> | <b>0.045</b>   | <b>666.453</b><br><b>(102.085 – 1230.820)</b> | <b>0.022</b>   | 69.399<br>(-1917.844 – 2056.643)          | 0.943          |
| IL-8                     | 408.761<br>(-407 – 1224.612)                  | 0.302          | <b>492.841</b><br><b>(17.816 – 967.866)</b>   | <b>0.042</b>   | -82.987<br>(-852.504 – 686.530)           | 0.825          |
| TNF-alpha                | 2.023<br>(-1.123 – 5.170)                     | 0.191          | <b>1.516</b><br><b>(0.329 – 2.703)</b>        | <b>0.014</b>   | <b>-2.707</b><br><b>(-5.261 – -0.153)</b> | <b>0.039</b>   |
| Principal Component 1    | <b>1.850</b><br><b>(0.119 – 3.581)</b>        | <b>0.038</b>   | <b>0.809</b><br><b>(0.353 – 1.264)</b>        | <b>0.001</b>   | -0.578<br>(-1.631 – 0.475)                | 0.268          |
| Principal Component 2    | -0.482<br>(-1.534 – 0.570)                    | 0.344          | 0.220<br>(-0.060 – 0.501)                     | 0.120          | -0.412<br>(-1.218 – 0.393)                | 0.301          |
| Principal Component 3    | -0.078<br>(-0.249 – 0.094)                    | 0.350          | -0.038<br>(-0.101 – 0.025)                    | 0.227          | -0.248<br>(-1.099 – 0.604)                | 0.553          |
